# Supplementary material for: Bone-Targeted Delivery of Novokinin as an Alternative Treatment Option for Rheumatoid Arthritis
Source: MDPI journal article supplement (doi:10.3390/pharmaceutics14081681), 2022-08-12

Figure S1. The orthogonal regression graphs with line best fit of RAS components vs ArA metabolites.

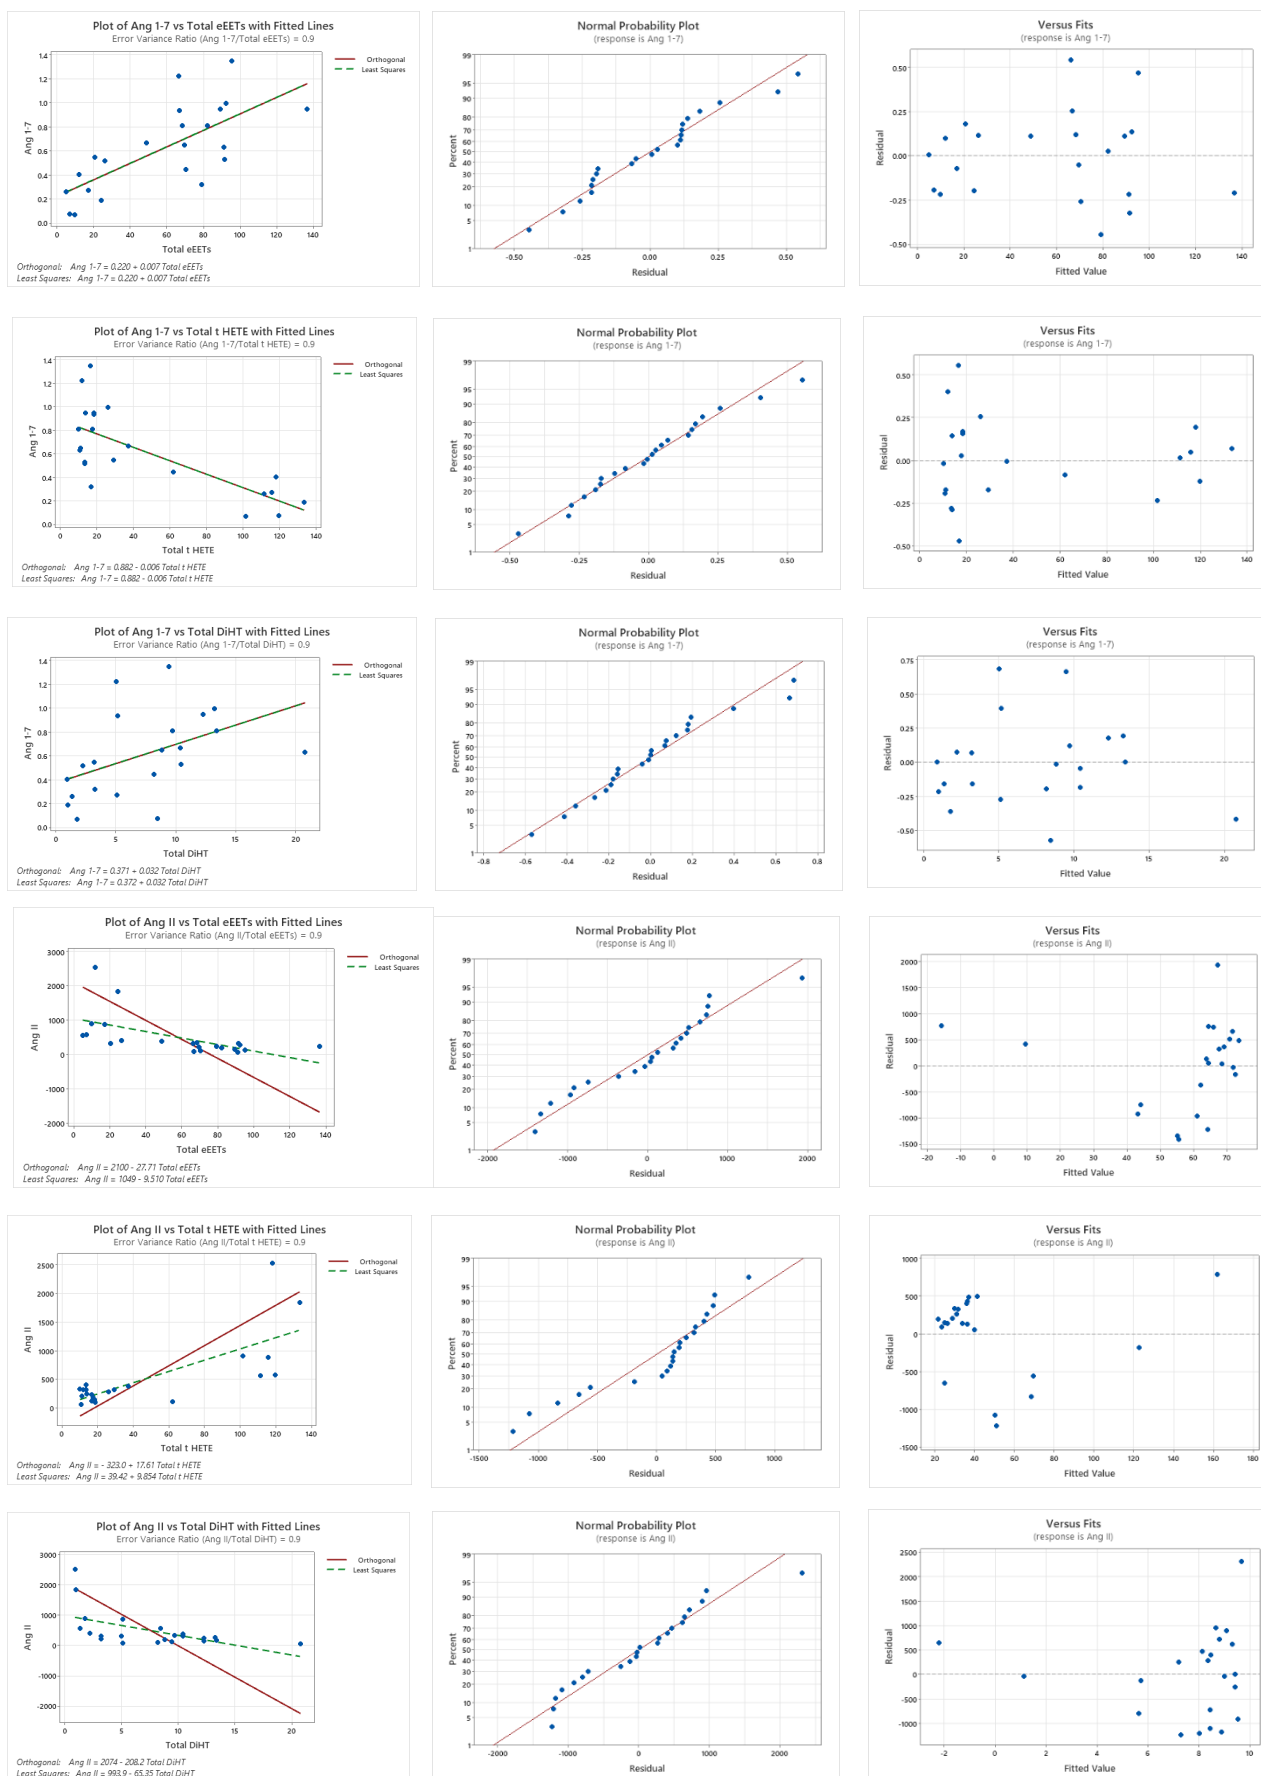

Supplement: s1 [file s1]
