# Supplementary material for: Bone-Targeted Delivery of Novokinin as an Alternative Treatment Option for Rheumatoid Arthritis
Source: MDPI journal article supplement (doi:10.3390/pharmaceutics14081681), 2022-08-12
Supplement: s1 [file s1]

**Table S1.** Orthogonal regression analysis results.

| Predictor      | Predictor Coef. | <sup>a</sup> CI of Predictor | <sup>b</sup> SE of Predictor Coef. | Z value | P value | Constant Coef. | <sup>a</sup> CI of Constant | Error in x-axis | Error in y-axis |
|----------------|-----------------|------------------------------|------------------------------------|---------|---------|----------------|-----------------------------|-----------------|-----------------|
| Ang 1.7        |                 |                              |                                    |         |         |                |                             |                 |                 |
| 11,12-EET      | 0.012           | (0.007; 0.018)               | 0.003                              | 4.600   | 0.000   | 0.246          | (0.057; 0.436)              | 0.068           | 0.061           |
| 14,15-EET      | 0.019           | (0.011; 0.027)               | 0.004                              | 4.830   | 0.000   | 0.252          | (0.072; 0.432)              | 0.064           | 0.058           |
| Total eEETs    | 0.007           | (0.004; 0.010)               | 0.001                              | 4.580   | 0.000   | 0.220          | (0.019; 0.419)              | 0.068           | 0.061           |
| 19-HETE        | -0.110          | (-0.160; -0.061)             | 0.025                              | -4.338  | 0.000   | 0.850          | (0.670; 1.002)              | 0.071           | 0.064           |
| 20-HETE        | -0.006          | (-0.008; -0.004)             | 0.001                              | -4.853  | 0.000   | 0.883          | (0.734; 1.032)              | 0.064           | 0.058           |
| Total t HETE   | -0.006          | (-0.008; -0.003)             | 0.001                              | -4.854  | 0.000   | 0.882          | (0.733; 1.031)              | 0.064           | 0.058           |
| T-EETs/T-HETEs | 0.075           | (0.036; 0.114)               | 0.020                              | 3.756   | 0.000   | 0.355          | (0.176; 0.534)              | 0.081           | 0.073           |
| 5,6-DiHT       | 0.247           | (0.084; 0.410)               | 0.083                              | 2.966   | 0.003   | 0.361          | (0.150; 0.572)              | 0.091           | 0.082           |
| 8,9-DiHT       | 1.183           | (0.632; 1.734)               | 0.281                              | 4.208   | 0.000   | -0.006         | (-0.321; 0.309)             | 0.037           | 0.033           |
| 11,12-DiHT     | 0.070           | (0.011; 0.128)               | 0.030                              | 2.336   | 0.020   | 0.392          | (0.161; 0.623)              | 0.109           | 0.098           |
| Total DiHT     | 0.032           | (0.006; 0.059)               | 0.014                              | 2.366   | 0.018   | 0.371          | (0.129; 0.614)              | 0.109           | 0.098           |
| Ang II         |                 |                              |                                    |         |         |                |                             |                 |                 |
| 11,12-EET      | -52.876         | (-89.572; -16.18)            | 18.723                             | -2.824  | 0.005   | 2076.738       | (915.851; 3237.620)         | 291.826         | 262.643         |
| 14,15-EET      | -63.560         | (-93.920; -33.200)           | 15.490                             | -4.103  | 0.000   | 1724.281       | (1078.710; 2369.850)        | 100.672         | 90.605          |
| Total eEETs    | -27.711         | (-45.290; -10.130)           | 8.968                              | -3.090  | 0.002   | 2100.215       | (1024.420; 3176.010)        | 897.738         | 807.964         |
| 19-HETE        | 426.846         | (182.320; 671.370)           | 124.759                            | 3.421   | 0.001   | -407.324       | (-1019.750; 205.100)        | 3.147           | 2.833           |
| 20-HETE        | 18.379          | (11.181; 25.577)             | 3.673                              | 5.004   | 0.000   | -319.640       | (-711.739; 72.459)          | 817.982         | 736.184         |
| Total t HETE   | 17.615          | (10.619; 24.610)             | 3.569                              | 4.935   | 0.000   | -322.993       | (-721.588; 75.603)          | 914.167         | 822.750         |
| T-EETs/T-HETEs | -362.518        | (-623.971; -101.070)         | 133.396                            | -2.718  | 0.007   | 1760.554       | (766.733; 2754.370)         | 6.668           | 6.001           |
| 5,6-DiHT       | -1372.640       | (-2522.930; -222.350)        | 586.893                            | -2.339  | 0.019   | 1913.940       | (643.130; 3184.750)         | 0.609           | 0.548           |
| 8,9-DiHT       | -3301.788       | (-5500.940; -1102.640)       | 1122.04                            | -2.943  | 0.003   | 2232.545       | (1019.620; 3445.470)        | 0.070           | 0.063           |
| 11,12-DiHT     | -496.300        | (-891.983; -100.620)         | 201.883                            | -2.458  | 0.014   | 2087.269       | (747.642; 3426.900)         | 4.260           | 3.834           |
| 14,15-DiHT     | -569.245        | (-1068.590; -69.900)         | 254.774                            | -2.234  | 0.025   | 2099.332       | (617.090; 3581.570)         | 3.835           | 3.451           |
| Total DiHT     | -208.195        | (-349.952; -66.440)          | 72.326                             | -2.879  | 0.004   | 2074.492       | (936.718; 3212.270)         | 18.206          | 16.385          |

<sup>a</sup>95% confidence intervals for each of the regression coefficients. <sup>b</sup>The standard error of a Predictor coefficient.
